# Supplementary material for: In Model, In Vitro and In Vivo Killing Efficacy of Antitumor Peptide RDP22 on MUG-Mel2, a Patient Derived Cell Line of an Aggressive Melanoma Metastasis
Source: MDPI journal article supplement (doi:10.3390/biomedicines10112961), 2022-11-17
Supplement: s1 [file s1]

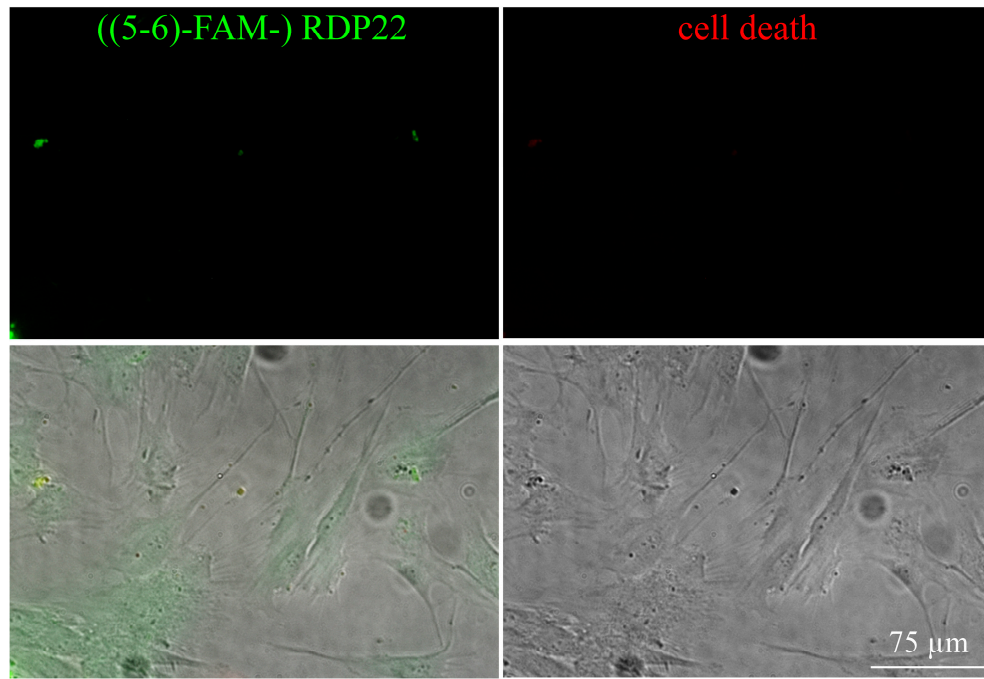

**Figure S2.** Interaction of RDP22 with non-malignant control cells. 10  $\mu$ M fluorescently labeled ((5–6)-FAM-) RDP22 (green) was incubated with non-malignant control cells of normal human dermal fibroblasts (NHDF) for 4 hours in presence of PI (red). In the second-row overlaps of fluorescence channels and bright field, respectively solely bright field pictures are shown. The pictures represent outcome of 3 independent data sets. RDP22 shows no significant interaction (green) or significant cell death (red) with or within NHDF cells.
