# Supplementary material for: In Model, In Vitro and In Vivo Killing Efficacy of Antitumor Peptide RDP22 on MUG-Mel2, a Patient Derived Cell Line of an Aggressive Melanoma Metastasis
Source: MDPI journal article supplement (doi:10.3390/biomedicines10112961), 2022-11-17
Supplement: s1 [file s1]

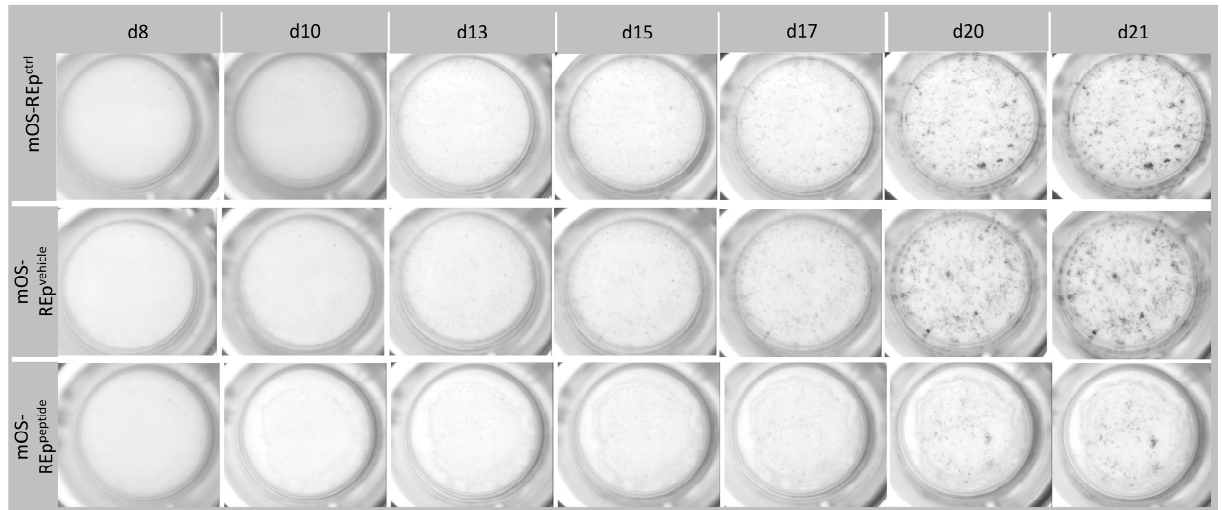

**Figure S3.** Non-invasive fully automated detection of melanoma pro- and regression. Images were taken during 21 days of culture duration at defined time points (d8, d10, d13, d15, d17, d20 and d21) using the in-house developed MediTOM device.
