# Supplementary material for: In Model, In Vitro and In Vivo Killing Efficacy of Antitumor Peptide RDP22 on MUG-Mel2, a Patient Derived Cell Line of an Aggressive Melanoma Metastasis
Source: MDPI journal article supplement (doi:10.3390/biomedicines10112961), 2022-11-17
Supplement: s1 [file s1]

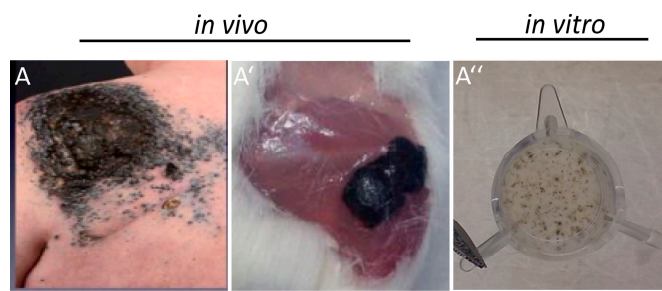

**Figure S1.** Persisting pigmentation of MUG-Mel2 in vivo and in vitro. A) Cutaneous metastases of a male patient as source for the MUG-Mel2 cell line. (A') Black tumor growing within 10 days in NSG mouse. (A'') Human 3D in vitro MUG-Mel2 melanoma model (mOS-REpMUG-Mel2) with pigmented melanoma clusters.
